# Supplementary figures and images for: The Role of Systemic Oxidative Status in Coronary Arterial and Peripheral Venous Blood of Patients with Unstable Angina Pectoris
Source: MDPI journal article supplement (doi:10.3390/life13071537), 2023-07-11

**Figure S1 CONSORT flow diagram. CONSORT, Consolidated Standards of Reporting Trials.**

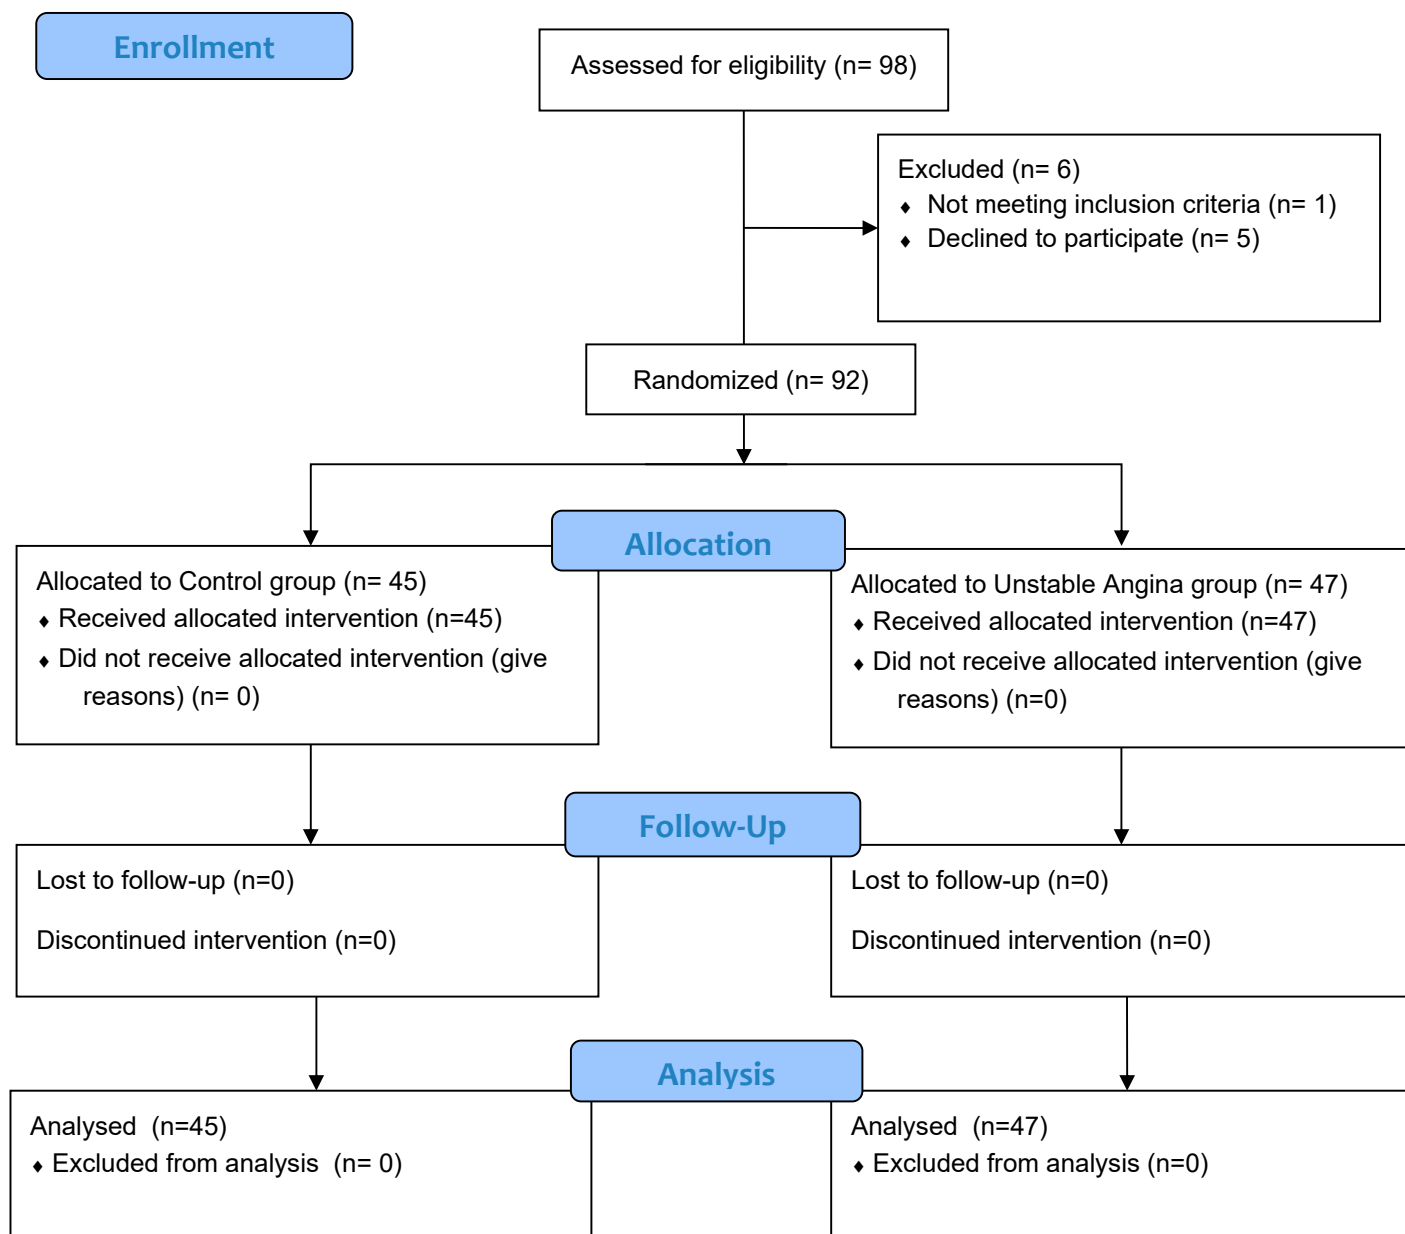

Supplement: s1 [file s1]
